# Supplementary material for: Interaction Patterns of Nurturant Support Exchanged in Online Health Social Networking
Source: PubMed Central journal article supplement (PMC3799482; doi:10.2196/jmir.1824), 2012-05-03
Supplement: jmir_v14i3e54_app1.pdf [file jmir_v14i3e54_app1.pdf]

| Patterns   | Offered                                         | Requested                       |
|------------|-------------------------------------------------|---------------------------------|
| EM>EST>NET | Forum Comments, Journal Posts, Journal Comments |                                 |
| EM&EST     |                                                 | Journal Posts, Journal Comments |
| EM>NET>EST | Forum Posts, Notes                              | Forum Posts, Notes              |
| EM=NET>EST |                                                 | Forum Comments                  |

**Table seq . Summary of offered and requested interaction patterns**
